# Supplementary material for: Interplay between SOX7 and RUNX1 regulates hemogenic endothelial fate in the yolk sac
Source: Oxford University Press journal article supplement (doi:10.1242/dev.140970), 2016-10-18
Supplement: dev140970supp.pdf [file dev140970supp.pdf]

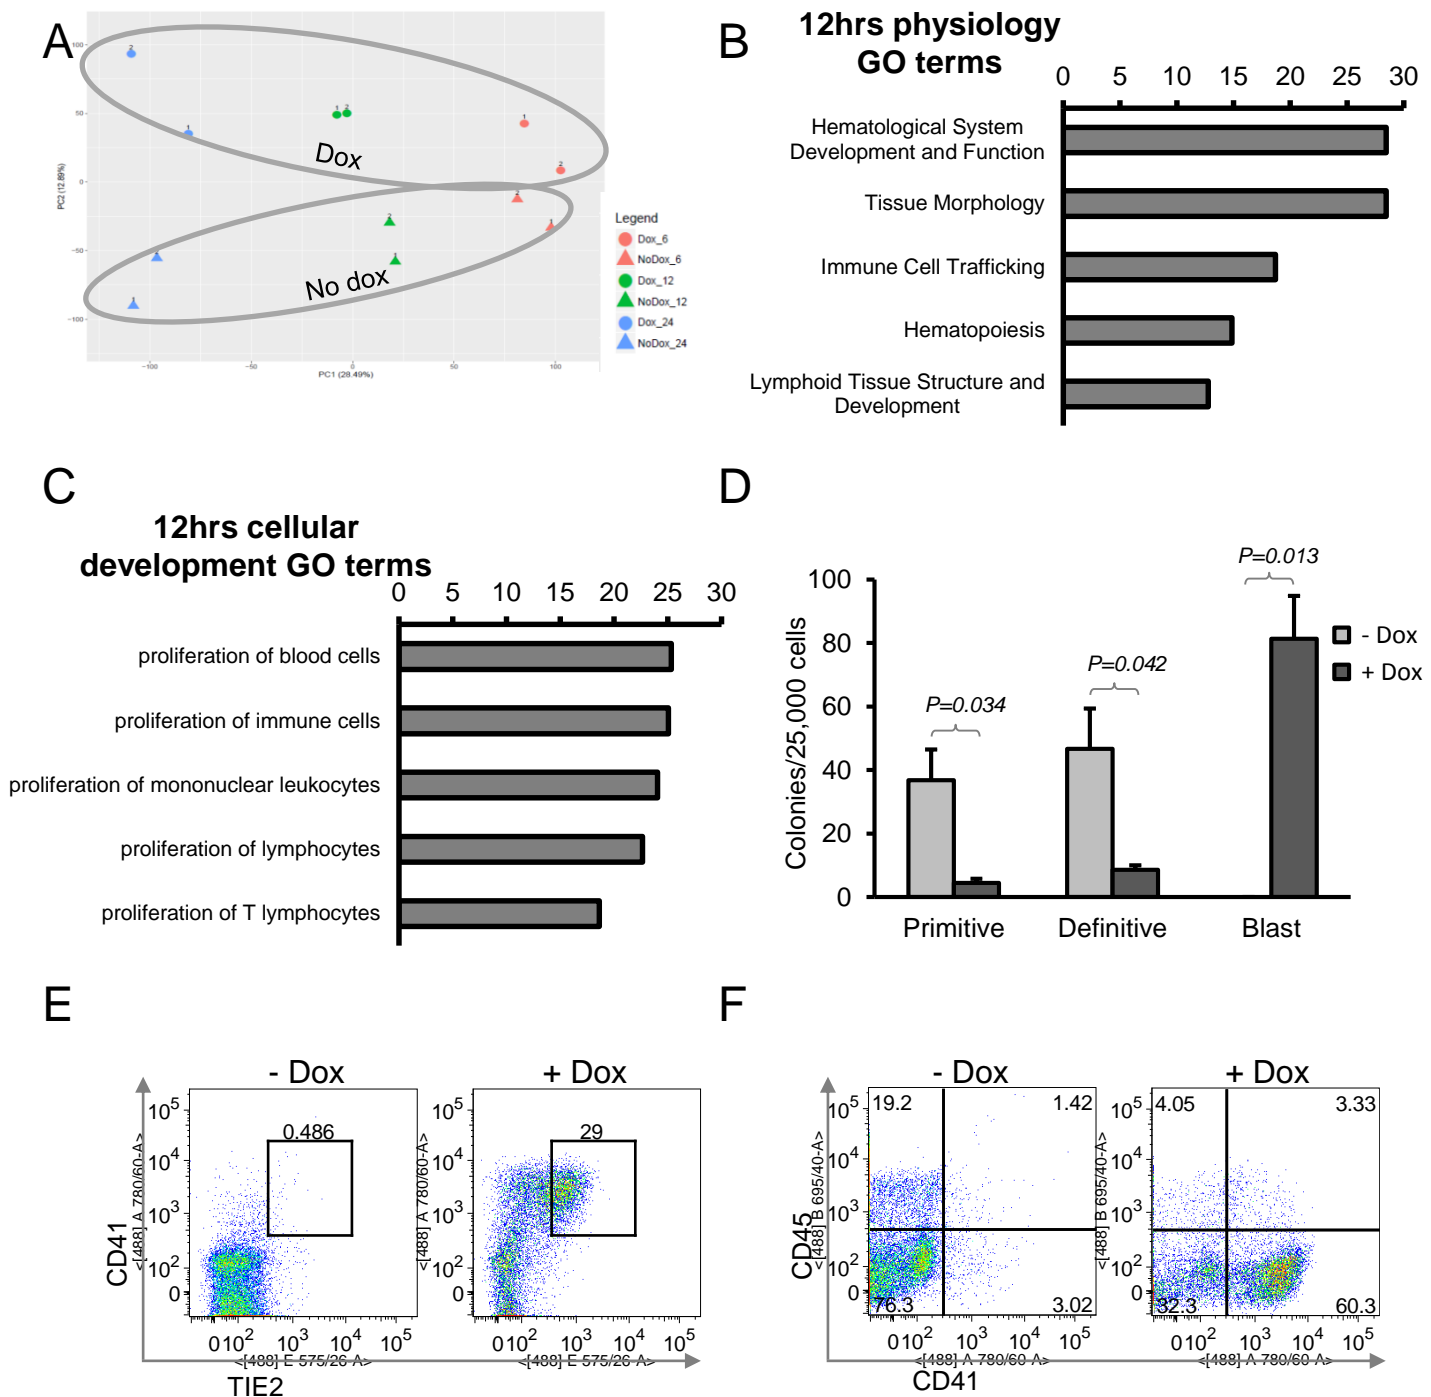

**Figure S1. SOX7 inhibits a hematopoietic transcriptional program.** FLK1<sup>+</sup> cells were sorted from day 3.5 *iSox7* EBs and cultured in HE differentiation media. Doxycycline was added after 48 hours, and RNAseq was performed 6, 12 and 24 hours post doxycycline induction. Cells were replated in a hematopoietic progenitor cell CFU assay 24 hours post doxycycline induction. (A) PCA plot of RNAseq dataset at 6, 12, and 24 hours post doxycycline induction. (B & C) Ingenuity Pathway Analysis of the genes inhibited by SOX7 at 12 hours. (D) Hematopoietic progenitor cell CFU assay with and without doxycycline (n=3 biological repeats, Student's one-tailed paired t-test). (E & F) Cells were harvested from the CFU assay after 8 days and analysed by flow cytometry.

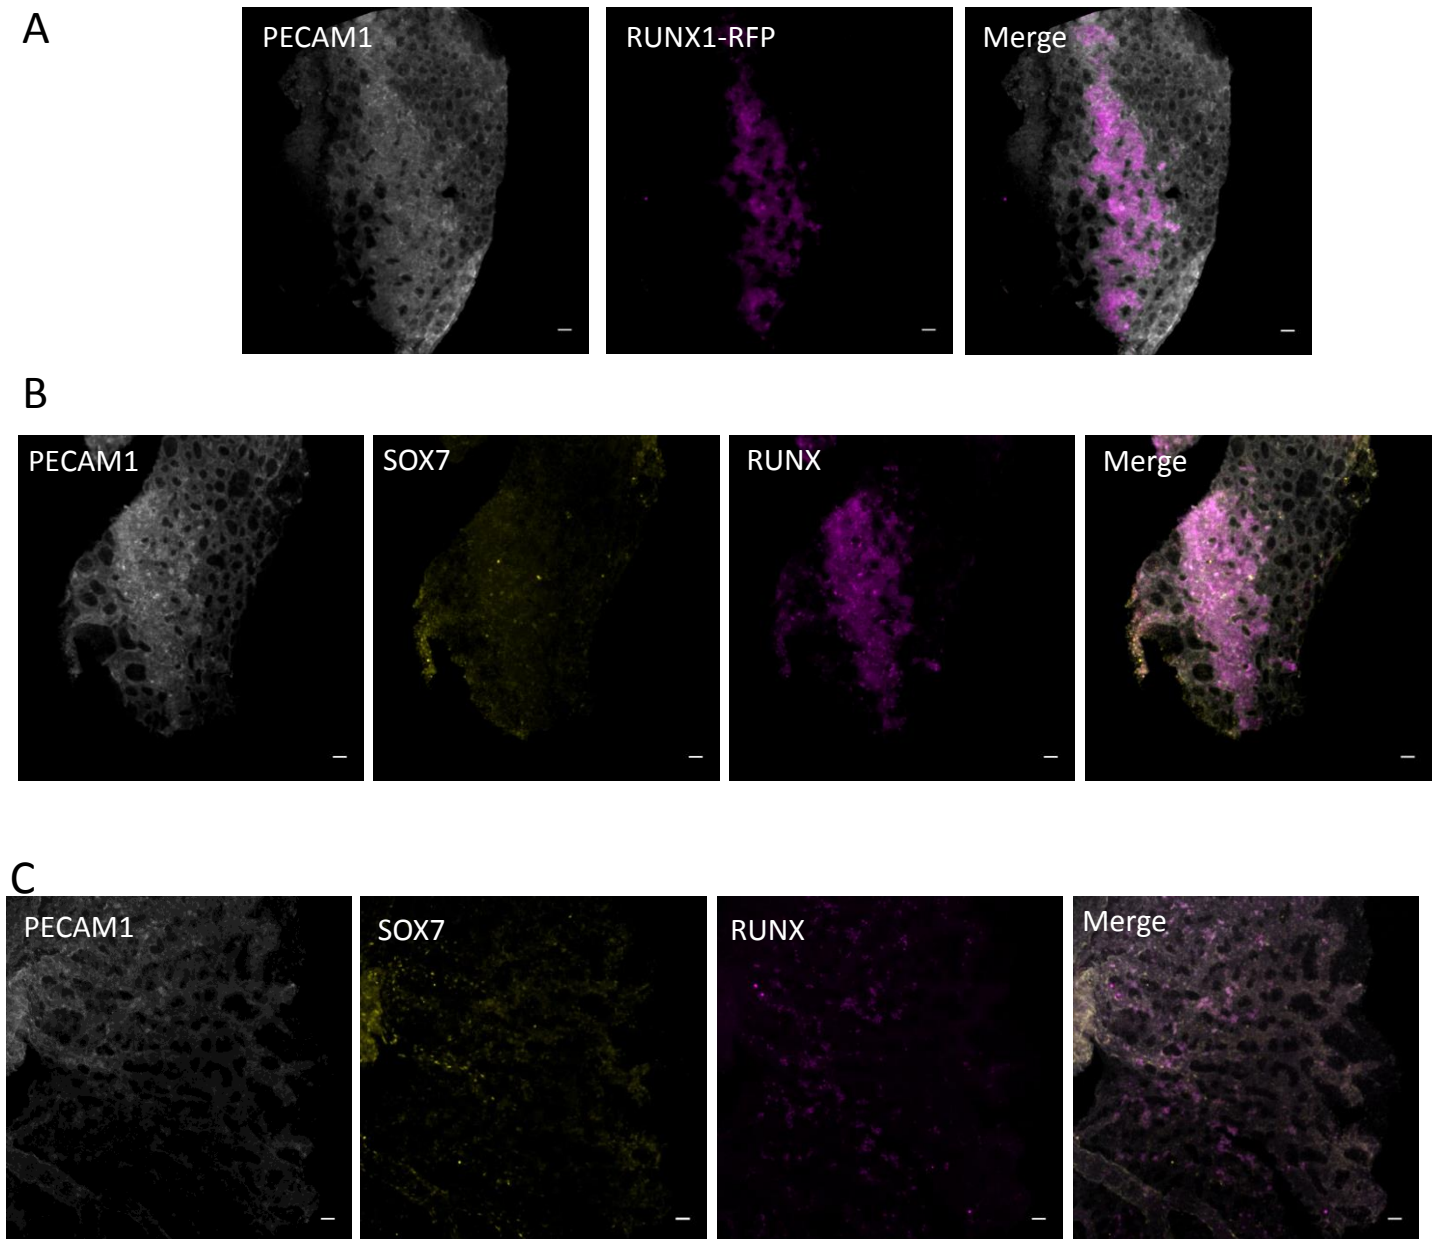

**Figure S2. SOX7 and RUNX expression in the yolk sac at E8.5 and E9.5** (A) Wholemount staining for PECAM1 together with proximal RUNX1-RFP expression at E8.5 from RUNX1<sup>RFP/WT</sup> embryos. (B) Wholemount staining for SOX7, RUNX and PECAM1 in yolk sacs at E8.5. (C) Wholemount staining for SOX7, RUNX and PECAM1 in yolk sacs at E9.5. Scale bars 50µm (A & B), 20µm (C).

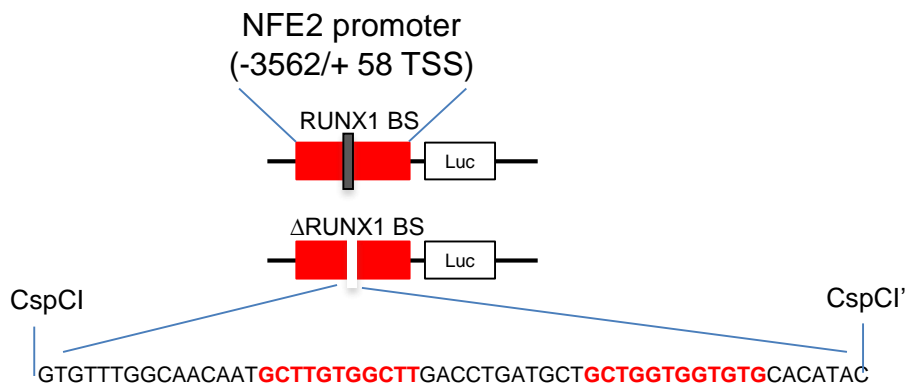

**Figure S3. RUNX1 binds the NFE2 promoter region.** (A) Deletion of two RUNX1 binding sites (red) in the NFE2 promoter using CspCI restriction enzyme.

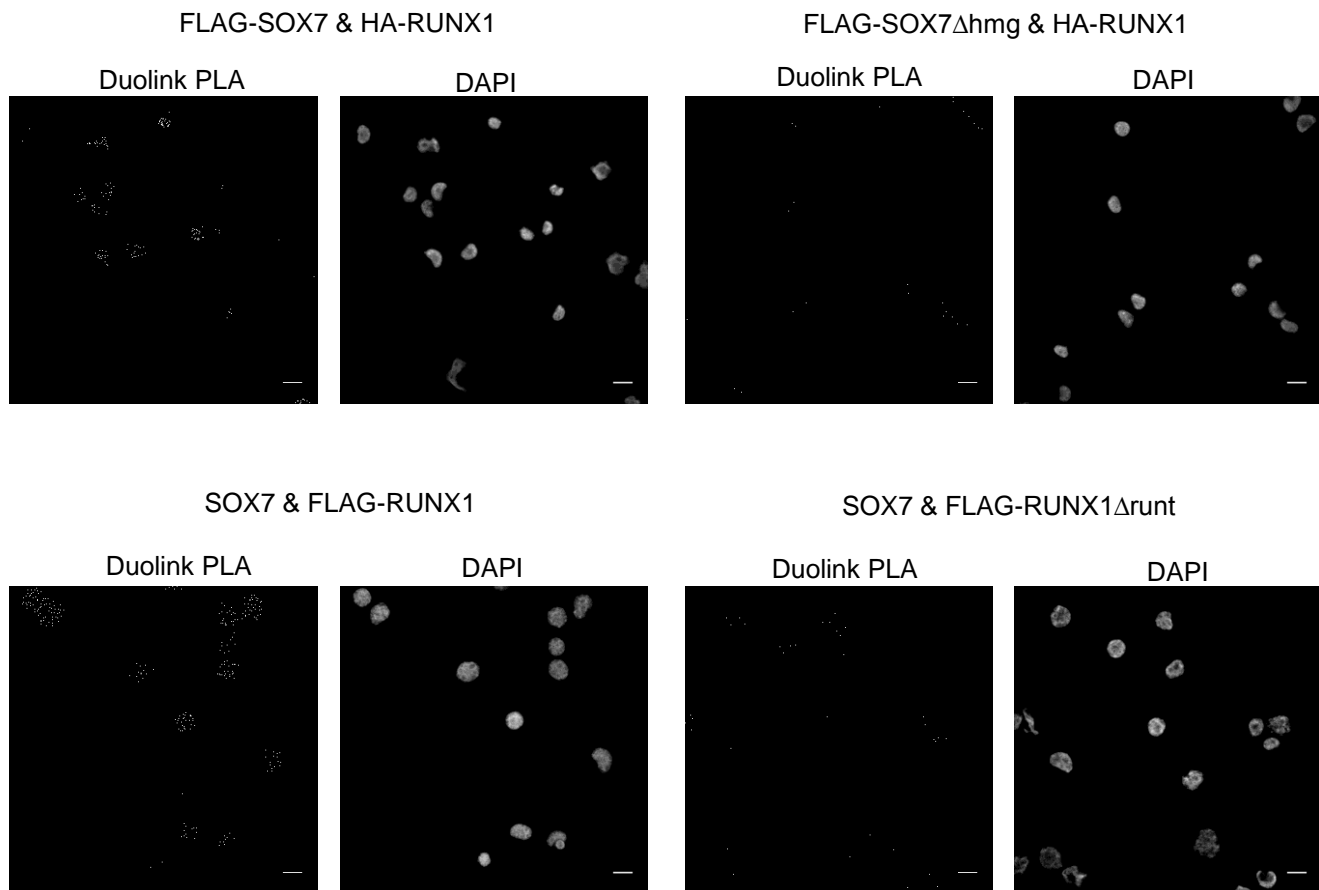

**Figure S4. Single channel images of the representative Duolink PLA in Figure 5.** HEK293T cells were transfected with the indicated pcDNA3 plasmids before Duolink PLA. Scale bars: 20 $\mu$ m.

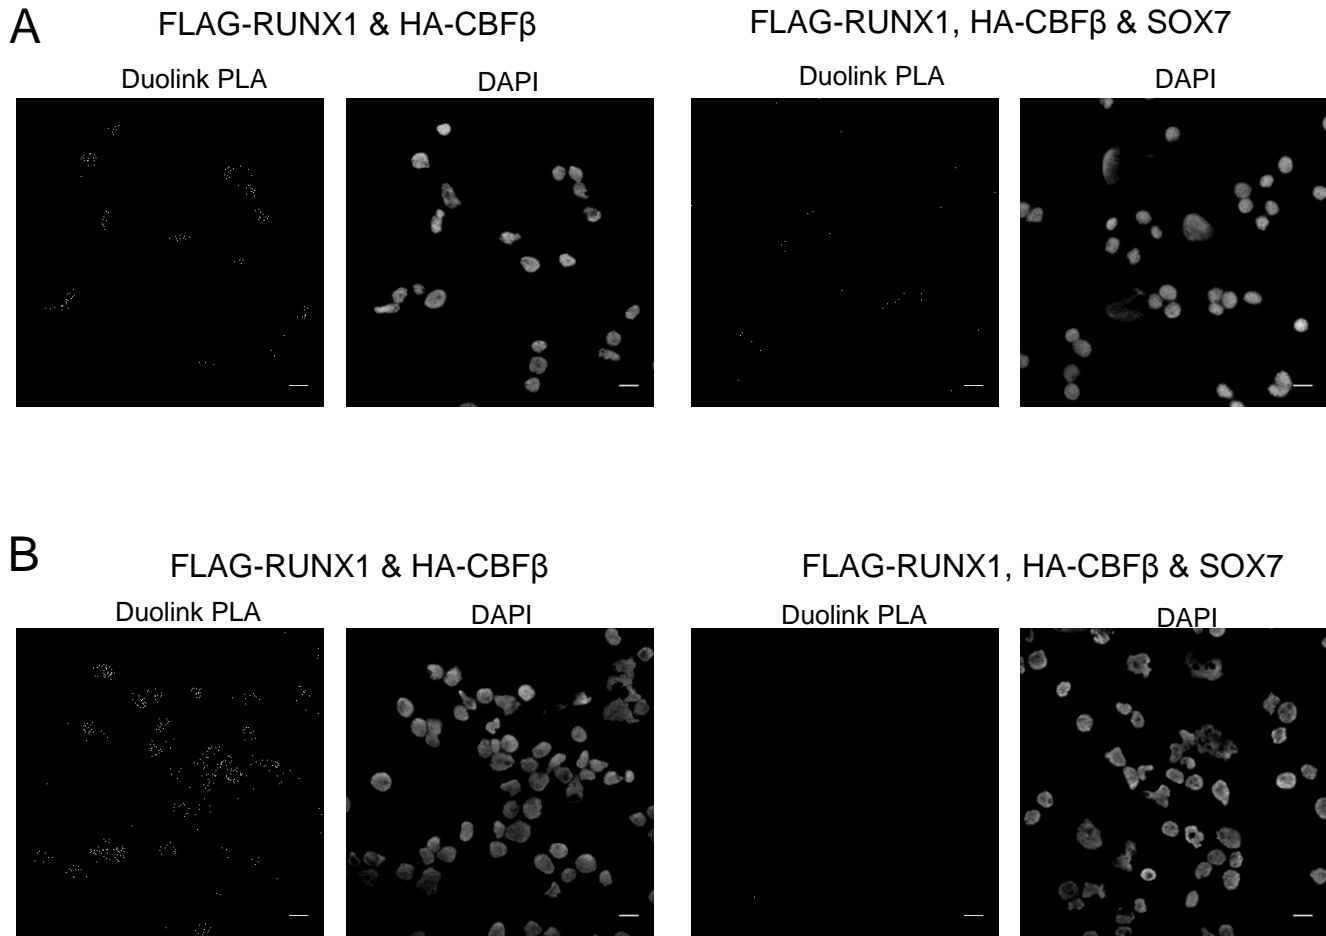

**Figure S5. Single channel images of representative Duolink PLA in Figure 6.** (A) RUNX1, CBF $\beta$  and SOX7 plasmids were transfected at equal concentration (1 $\mu$ g each). (B) SOX7 was transfected at 3 times greater concentration (3 $\mu$ g) than RUNX1 and CBF $\beta$  plasmids (1 $\mu$ g each). Scale bars: 20 $\mu$ m.

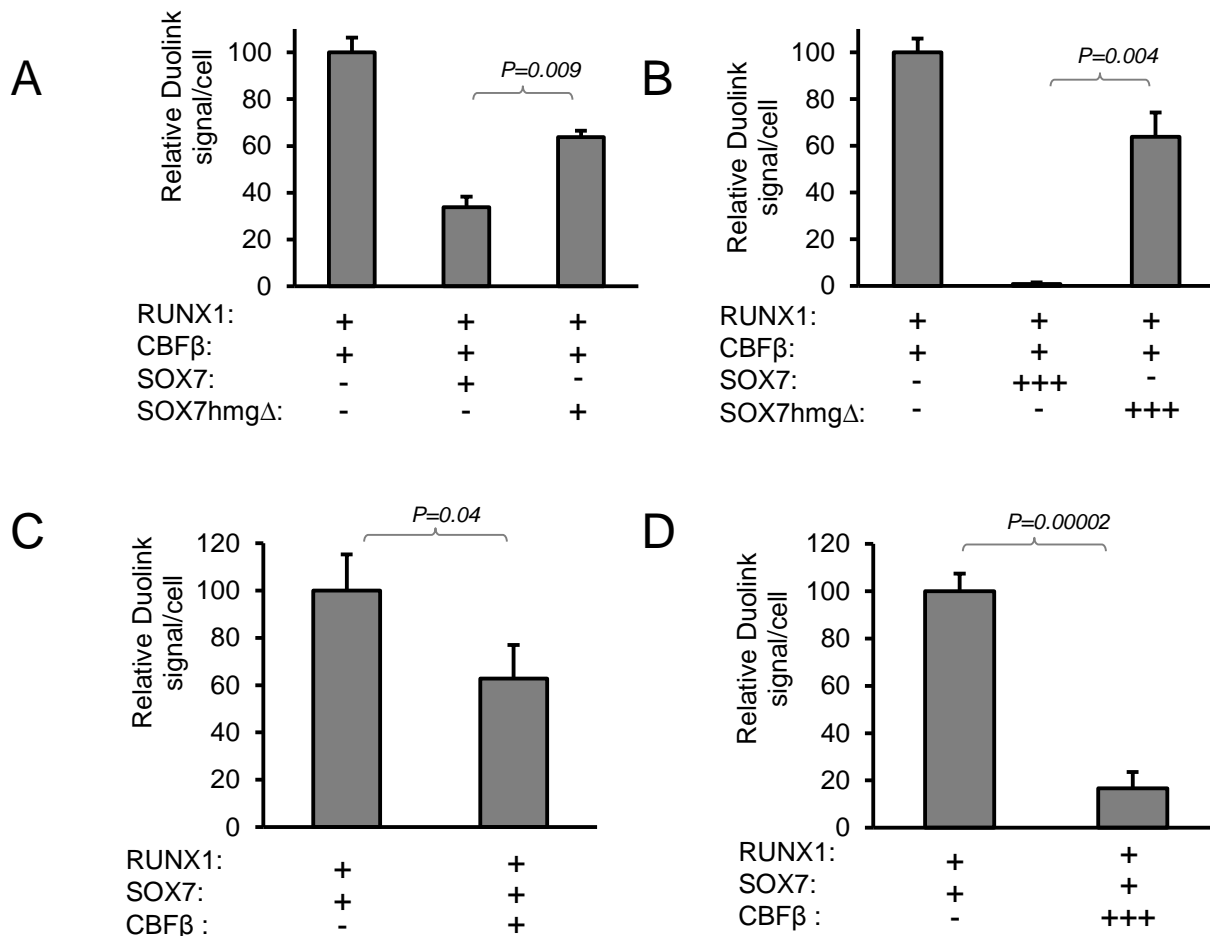

**Figure S6. Competition between SOX7 and CBFβ for RUNX1 binding.** HEK293T cells were transfected with pcDNA3 RUNX1, CBFβ, SOX7 and SOX7hmgΔ plasmids as indicated, together with a pcDNA3-GFP plasmid. Transfected cells were enriched by sorting for GFP before subsequent Duolink PLA analysis. (A & B) Duolink PLA analysis between RUNX1 and CBFβ, with SOX7/SOX7hmgΔ added as competitor. (A) plasmids were transfected at equal concentration (1μg each plasmid). (B) SOX7/SOX7hmgΔ plasmids were transfected at a 3 times greater concentration (3μg) than RUNX1 and CBFβ plasmids (1μg each). (C & D) Duolink PLA analysis between RUNX1 and SOX7, with CBFβ added as a competitor. (C) RUNX1, SOX7 and CBFβ plasmids were transfected at equal concentration (1μg each). (D) CBFβ plasmid was transfected at 3 times greater concentration (3μg) than RUNX1 and SOX7 plasmids (1μg each). All experiments are n=5, Student's two-tailed t-test.

**Table S1.** Differentially expressed genes at 6 hours, at least 1.5-fold change

[Click here to Download Table S1](#)

**Table S2.** Differentially expressed genes at 12 hours, at least 1.5-fold change

[Click here to Download Table S2](#)

**Table S3.** Differentially expressed genes at 24 hours, at least 1.5 fold change

[Click here to Download Table S3](#)

**Table S4.** List of PCR primers

[Click here to Download Table S4](#)
